# Supplementary material for: Obtaining sub-daily new snow density from automated measurements in high mountain regions
Source: Copernicus journal article supplement (doi:10.5194/hess-2017-579), 2017-10-06
Supplement: Supplementary file 1 [file hess-2017-579-supplement.pdf]

## **Supplement**

In this supplement the figures according to Fig. 4, Fig. 5 and Fig. 6 are shown for all stations and time periods considered in this study.

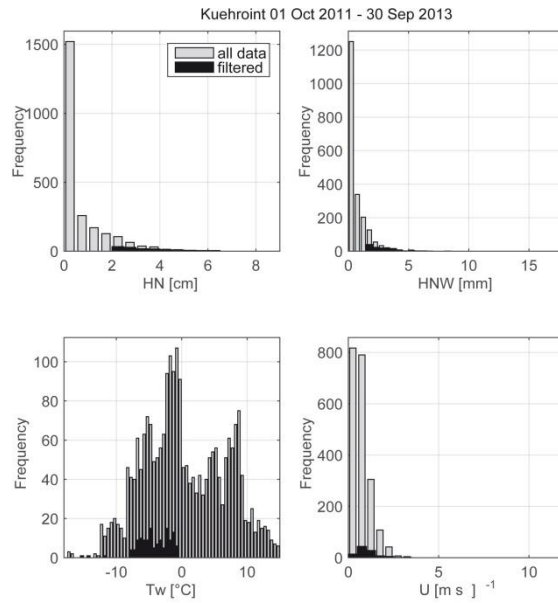

**Figure S01: Histogram plots of all data consisting precipitation signal and positive HS changes ( $n_p$ , grey) and data filtered with the thresholds  $HN > 2$  cm,  $HNW > 1.5$  mm,  $Tw < 0^\circ$  C and  $U < 5\text{ms}^{-1}$  ( $n_{th}$ ) at K  hroint station for the period 2 (1 Oct 2011 - 30 Sep 2013).**

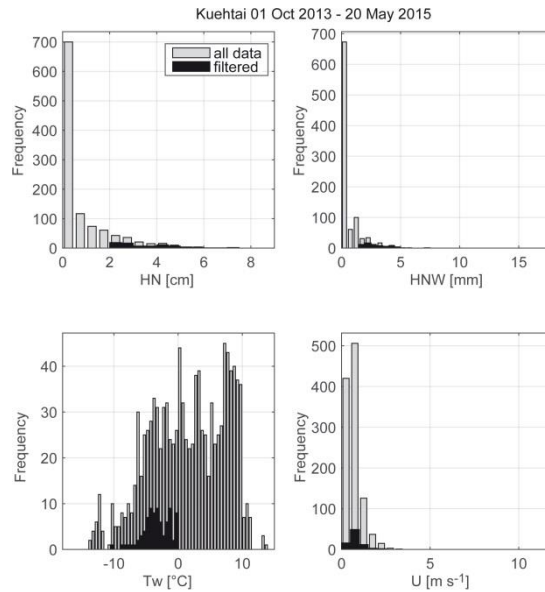

**Figure S02: Histogram plots of all data consisting precipitation signal and positive HS changes ( $n_p$ , grey) and data filtered with the thresholds  $HN > 2$  cm,  $HNW > 1.5$  mm,  $Tw < 0^\circ$  C and  $U < 5\text{ms}^{-1}$  ( $n_{th}$ ) at K  htai station for the period 1 (1 Oct 2013 - 20 May 2015).**

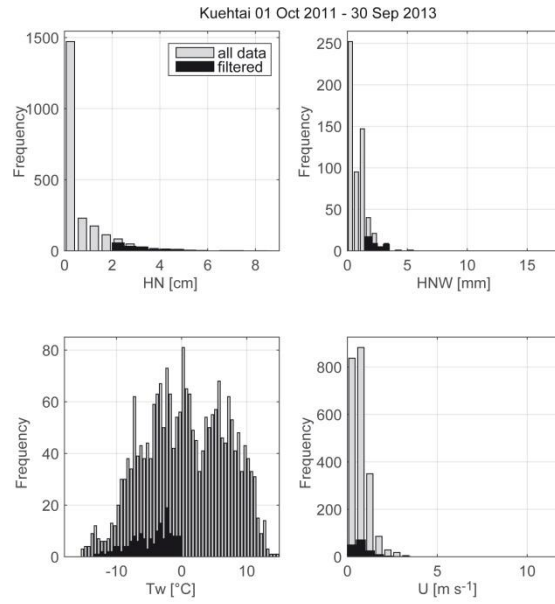

**Figure S03:** Histogram plots of all data consisting precipitation signal and positive HS changes ( $n_p$ , grey) and data filtered with the thresholds  $HN > 2$  cm,  $HNW > 1.5$  mm,  $Tw < 0^\circ$  C and  $U < 5$  ms<sup>-1</sup> ( $n_{th}$ ) at Kühtai station for the period 2 (1 Oct 2011 - 30 Sep 2013).

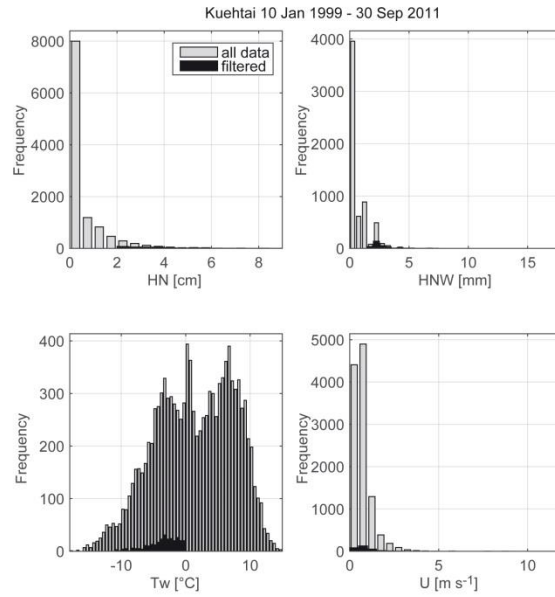

**Figure S04:** Histogram plots of all data consisting precipitation signal and positive HS changes ( $n_p$ , grey) and data filtered with the thresholds  $HN > 2$  cm,  $HNW > 1.5$  mm,  $Tw < 0^\circ$  C and  $U < 5$  ms<sup>-1</sup> ( $n_{th}$ ) at Kühtai station for the period 3 (1 Oct 1999 - 30 Sep 2011).

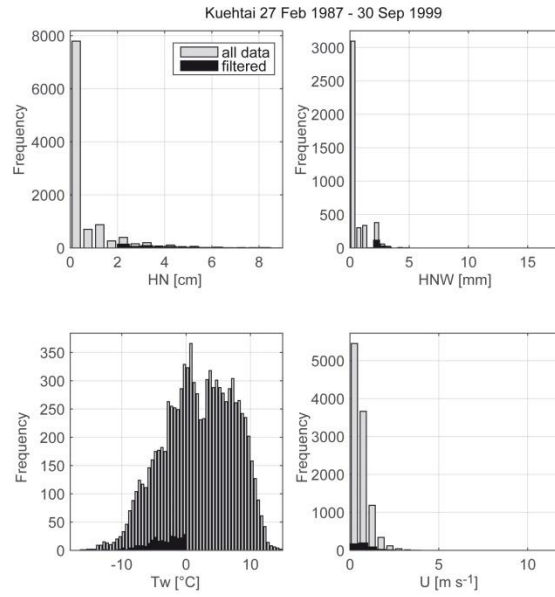

**Figure S05: Histogram plots of all data consisting precipitation signal and positive HS changes ( $n_p$ , grey) and data filtered with the thresholds  $HN > 2$  cm,  $HNW > 1.5$  mm,  $Tw < 0^\circ$  C and  $U < 5$  ms<sup>-1</sup> ( $n_{th}$ ) at Kühtai station for the period 4 (27 Feb 1987 - 30 Sep 1999).**

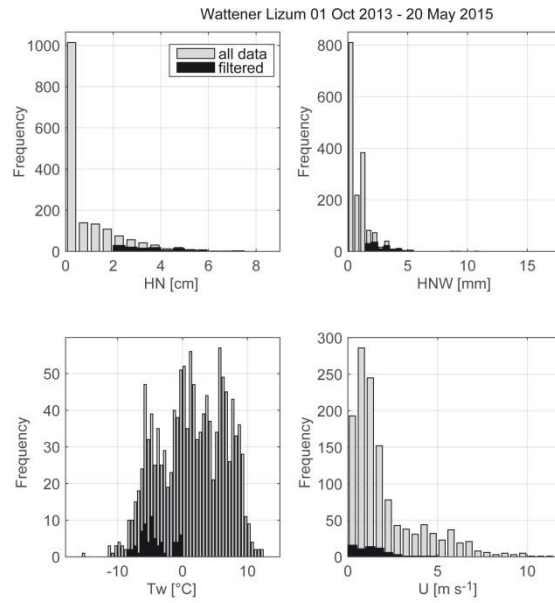

**Figure S06: Histogram plots of all data consisting precipitation signal and positive HS changes ( $n_p$ , grey) and data filtered with the thresholds  $HN > 2$  cm,  $HNW > 1.5$  mm,  $Tw < 0^\circ$  C and  $U < 5$  ms<sup>-1</sup> ( $n_{th}$ ) at Wattener Lizum for the period 1 (1 Oct 2013 - 20 May 2015).**

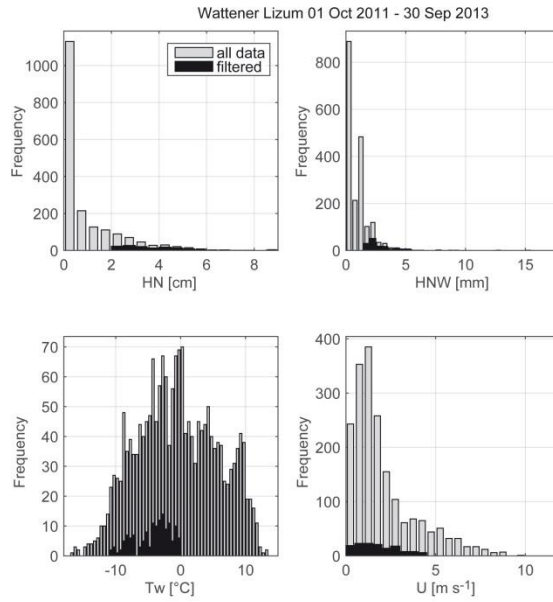

**Figure S07:** Histogram plots of all data consisting precipitation signal and positive HS changes ( $n_p$ , grey) and data filtered with the thresholds  $HN > 2$  cm,  $HNW > 1.5$  mm,  $Tw < 0^\circ$  C and  $U < 5$  ms<sup>-1</sup> ( $n_{th}$ ) at Wattener Lizum station for the period 2 (1 Oct 2011 - 30 Sep 2013).

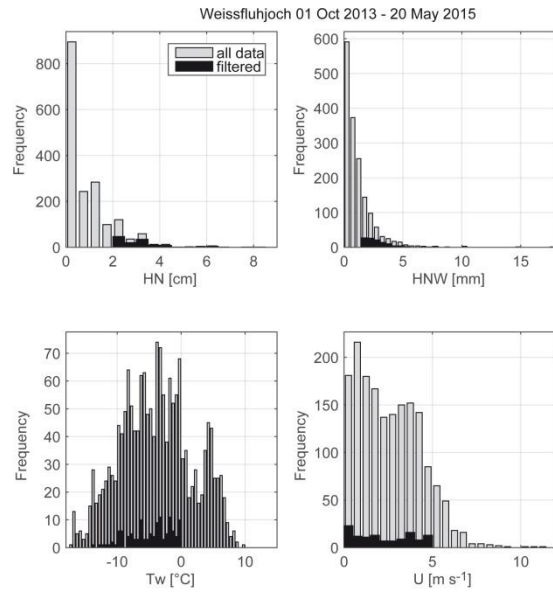

**Figure S08:** Histogram plots of all data consisting precipitation signal and positive HS changes ( $n_p$ , grey) and data filtered with the thresholds  $HN > 2$  cm,  $HNW > 1.5$  mm,  $Tw < 0^\circ$  C and  $U < 5$  ms<sup>-1</sup> ( $n_{th}$ ) at Weissfluhjoch station for the period 1 (1 Oct 2013 - 20 May 2015).

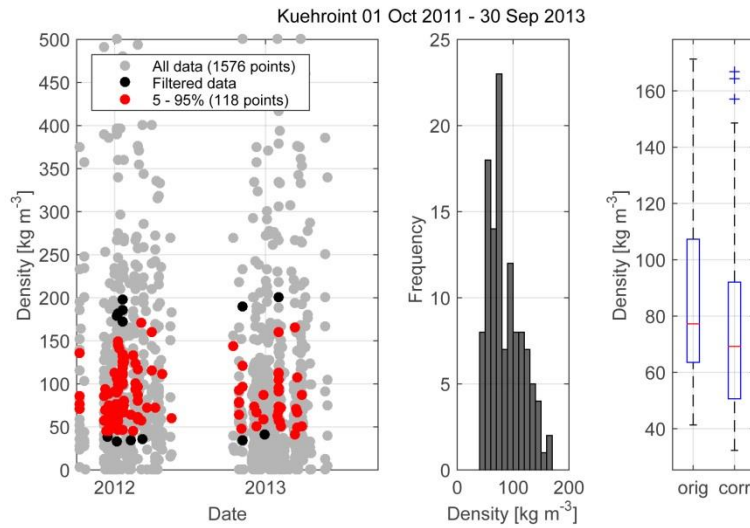

Figure S09: Distribution of calculated snow densities at K  hrint station for the period 2 (1 Oct 2011 - 30 Sep 2013): Left: All data with precipitation signal and positive HS change ( $n_p$ , grey dots), of all data filtered with the thresholds  $HN > 2$  cm,  $HNW > 1.5$  mm,  $Tw < 0^\circ$  C and  $U < 5$  ms $^{-1}$  (black dots) and filtered data reduced by cutting off at 5 % and 95 % percentiles ( $n_{th}$ , red dots). Middle: Histogram of all filtered densities ( $\rho_{th}$ ). Right: The boxplot showing median, 25 % and 75 % interquartile range of uncorrected densities and densities corrected for settling of the snowpack.

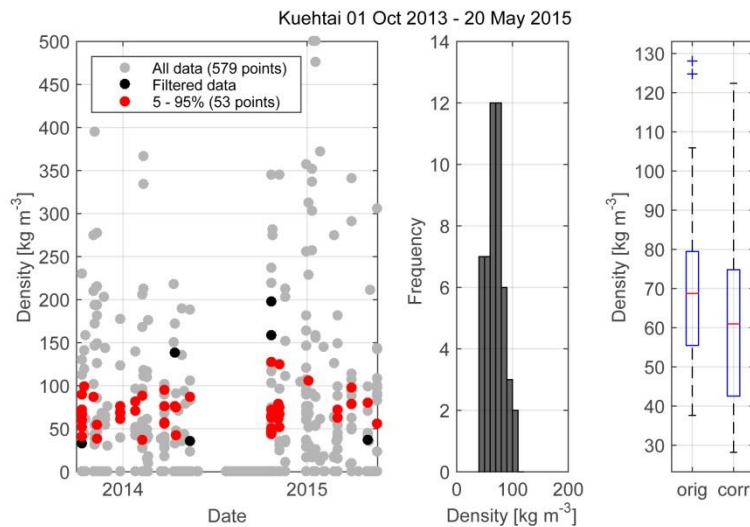

Figure S10: Distribution of calculated snow densities at K  htai station for the period 1 (1 Oct 2013 - 20 May 2015): Left: All data with precipitation signal and positive HS change ( $n_p$ , grey dots), of all data filtered with the thresholds  $HN > 2$  cm,  $HNW > 1.5$  mm,  $Tw < 0^\circ$  C and  $U < 5$  ms $^{-1}$  (black dots) and filtered data reduced by cutting off at 5 % and 95 % percentiles ( $n_{th}$ , red dots). Middle: Histogram of all filtered densities ( $\rho_{th}$ ). Right: The boxplot showing median, 25 % and 75 % interquartile range of uncorrected densities and densities corrected for settling of the snowpack.

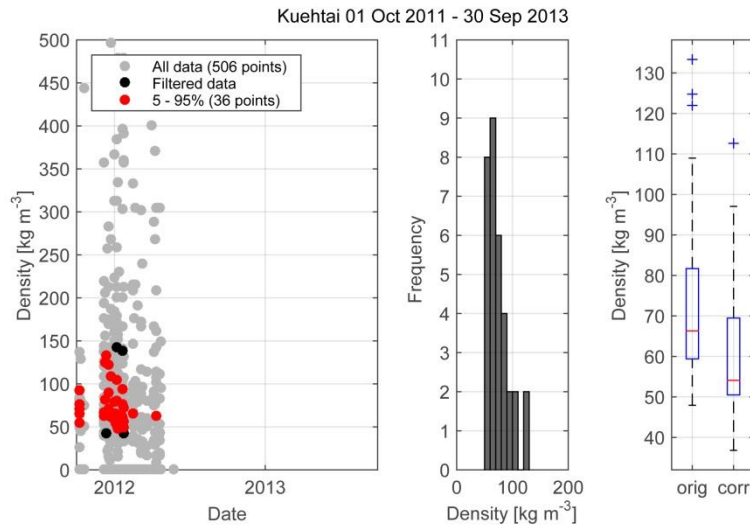

**Figure S11: Distribution of calculated snow densities at Kühtai station for the period 2 (1 Oct 2011 - 30 Sep 2013):** Left: All data with precipitation signal and positive HS change ( $n_p$ , grey dots), of all data filtered with the thresholds  $HN > 2$  cm,  $HNW > 1.5$  mm,  $Tw < 0^\circ$  C and  $U < 5$  ms<sup>-1</sup> (black dots) and filtered data reduced by cutting off at 5 % and 95 % percentiles ( $n_{th}$ , red dots). Middle: Histogram of all filtered densities ( $\rho_{th}$ ). Right: The boxplot showing median, 25 % and 75 % interquartile range of uncorrected densities and densities corrected for settling of the snowpack.

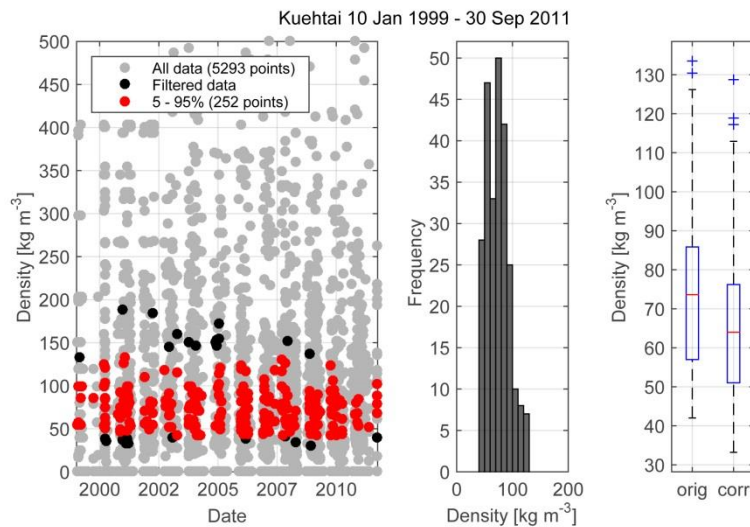

**Figure S12: Distribution of calculated snow densities at Kühtai station for the period 3 (1 Oct 1999 - 30 Sep 2011):** Left: All data with precipitation signal and positive HS change ( $n_p$ , grey dots), of all data filtered with the thresholds  $HN > 2$  cm,  $HNW > 1.5$  mm,  $Tw < 0^\circ$  C and  $U < 5$  ms<sup>-1</sup> (black dots) and filtered data reduced by cutting off at 5 % and 95 % percentiles ( $n_{th}$ , red dots). Middle: Histogram of all filtered densities ( $\rho_{th}$ ). Right: The boxplot showing median, 25 % and 75 % interquartile range of uncorrected densities and densities corrected for settling of the snowpack.

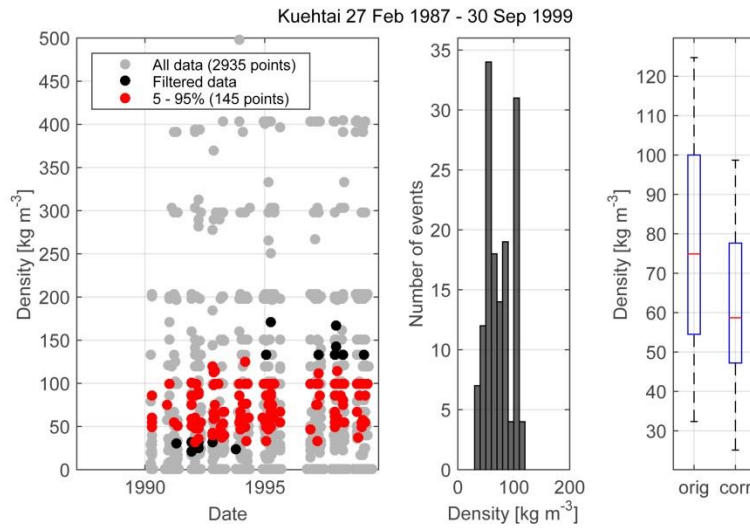

Figure S13: Distribution of calculated snow densities at Kühtai station for the period 4 (27 Feb 1987 - 30 Sep 1999): Left: All data with precipitation signal and positive HS change ( $n_p$ , grey dots), of all data filtered with the thresholds  $HN > 2$  cm,  $HNW > 1.5$  mm,  $Tw < 0^\circ$  C and  $U < 5$  ms<sup>-1</sup> (black dots) and filtered data reduced by cutting off at 5 % and 95 % percentiles ( $n_{th}$ , red dots). Middle: Histogram of all filtered densities ( $\rho_{th}$ ). Right: The boxplot showing median, 25 % and 75 % interquartile range of uncorrected densities and densities corrected for settling of the snowpack.

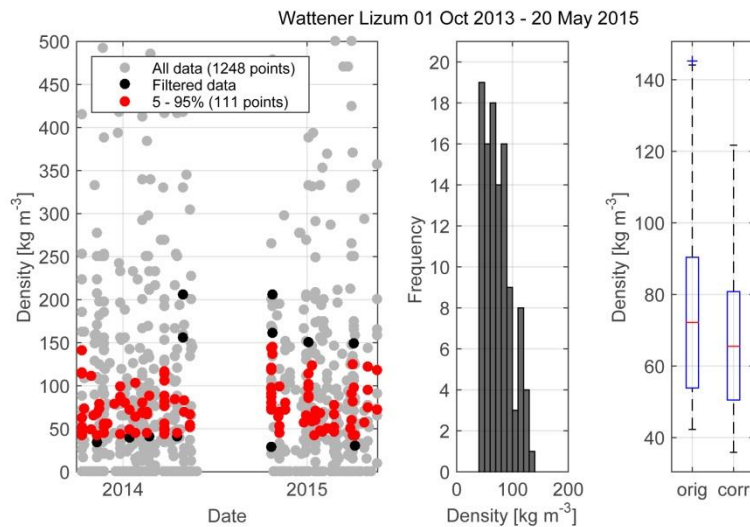

Figure S14: Distribution of calculated snow densities at Wattener Lizum station for the period 1 (1 Oct 2013 - 20 May 2015): Left: All data with precipitation signal and positive HS change ( $n_p$ , grey dots), of all data filtered with the thresholds  $HN > 2$  cm,  $HNW > 1.5$  mm,  $Tw < 0^\circ$  C and  $U < 5$  ms<sup>-1</sup> (black dots) and filtered data reduced by cutting off at 5 % and 95 % percentiles ( $n_{th}$ , red dots). Middle: Histogram of all filtered densities ( $\rho_{th}$ ). Right: The boxplot showing median, 25 % and 75 % interquartile range of uncorrected densities and densities corrected for settling of the snowpack.



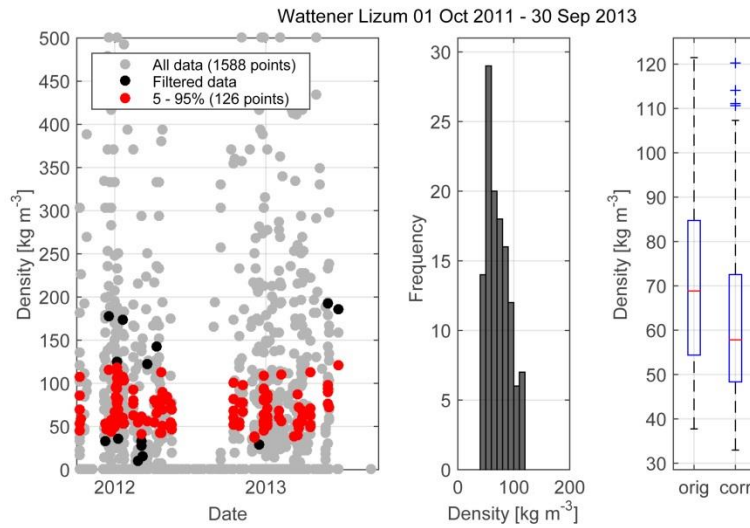

Figure S15: Distribution of calculated snow densities at Wattener Lizum station for the period 2 (1 Oct 2011 - 30 Sep 2013): Left: All data with precipitation signal and positive HS change ( $n_p$ , grey dots), of all data filtered with the thresholds  $HN > 2$  cm,  $HNW > 1.5$  mm,  $Tw < 0^\circ$  C and  $U < 5$  ms<sup>-1</sup> (black dots) and filtered data reduced by cutting off at 5 % and 95 % percentiles ( $n_{th}$ , red dots). Middle: Histogram of all filtered densities ( $\rho_{th}$ ). Right: The boxplot showing median, 25 % and 75 % interquartile range of uncorrected densities and densities corrected for settling of the snowpack.

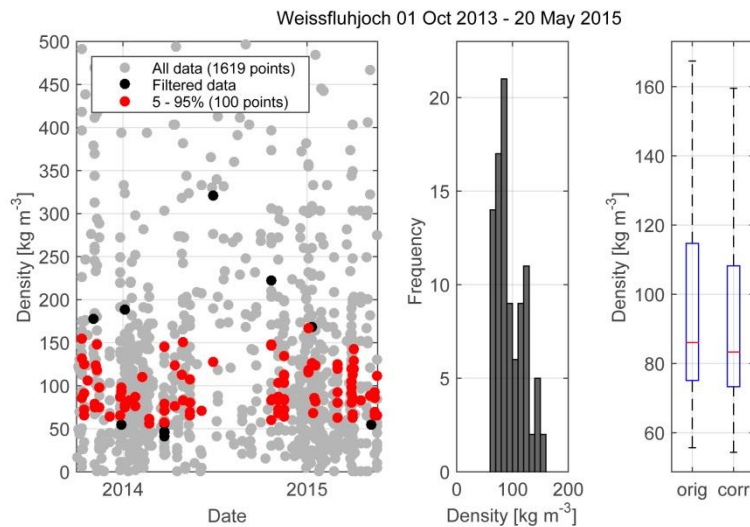

Figure S16: Distribution of calculated snow densities at Weissfluhjoch station for the period 1 (1 Oct 2013 - 20 May 2015): Left: All data with precipitation signal and positive HS change ( $n_p$ , grey dots), of all data filtered with the thresholds  $HN > 2$  cm,  $HNW > 1.5$  mm,  $Tw < 0^\circ$  C and  $U < 5$  ms<sup>-1</sup> (black dots) and filtered data reduced by cutting off at 5 % and 95 % percentiles ( $n_{th}$ , red dots). Middle: Histogram of all filtered densities ( $\rho_{th}$ ). Right: The boxplot showing median, 25 % and 75 % interquartile range of uncorrected densities and densities corrected for settling of the snowpack.

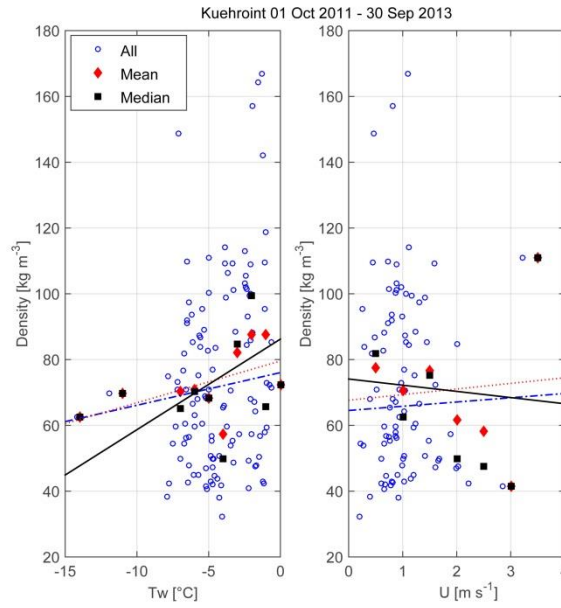

Figure S17: Linear regression between the corrected densities ( $\rho_{\text{corr}}$ ) as dependent variable and wet bulb temperature ( $T_w$ , left) as well as wind speed ( $U$ , right) as explanatory variables for all filtered value pairs (nth, blues dots, dashed blue line) at K  hroint station for the period 2 (1 Oct 2011 - 30 Sep 2013), and for the class mean (red diamonds, dotted red line) and median (black squares, solid black line) of binned  $0.5^\circ \text{ K}$  classes and of binned  $0.5 \text{ ms}^{-1}$  classes, respectively. Numbers are given in Tab. 3 and 4.

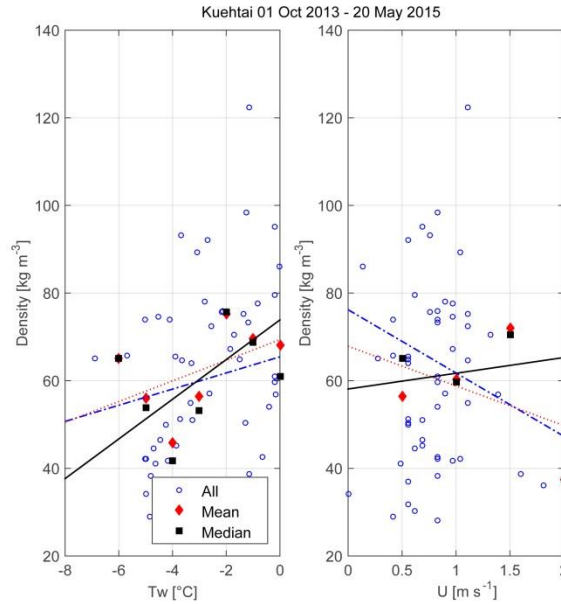

Figure S18: Linear regression between the corrected densities ( $\rho_{\text{corr}}$ ) as dependent variable and wet bulb temperature ( $T_w$ , left) as well as wind speed ( $U$ , right) as explanatory variables for all filtered value pairs (nth, blues dots, dashed blue line) at K  htai station for the period 1 (Oct 2013 - 20 May 2015), and for the class mean (red diamonds, dotted red line) and median (black squares, solid black line) of binned  $0.5^\circ \text{ K}$  classes and of binned  $0.5 \text{ ms}^{-1}$  classes, respectively. Numbers are given in Tab. 3 and 4.

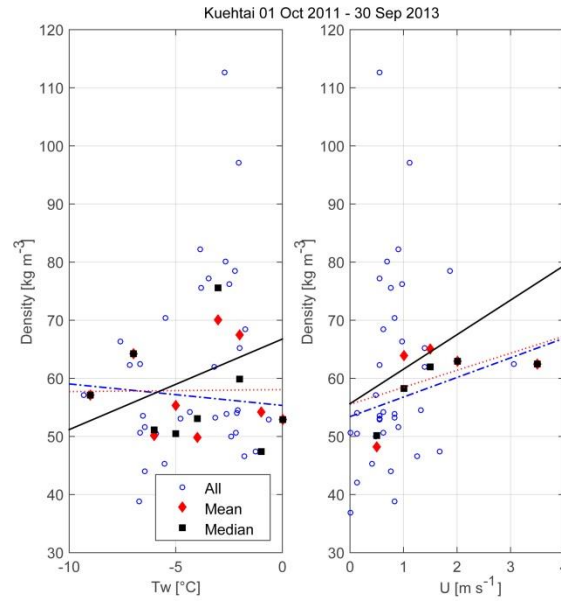

Figure S19: Linear regression between the corrected densities ( $\rho_{\text{corr}}$ ) as dependent variable and wet bulb temperature ( $T_w$ , left) as well as wind speed ( $U$ , right) as explanatory variables for all filtered value pairs (nth, blues dots, dashed blue line) at Kühtai station for the period 2 (1 Oct 2011 - 30 Sep 2013), for the class mean (red diamonds, dotted red line) and median (black squares, solid black line) of binned  $0.5^\circ \text{ K}$  classes and of binned  $0.5 \text{ ms}^{-1}$  classes, respectively. Numbers are given in Tab. 3 and 4.

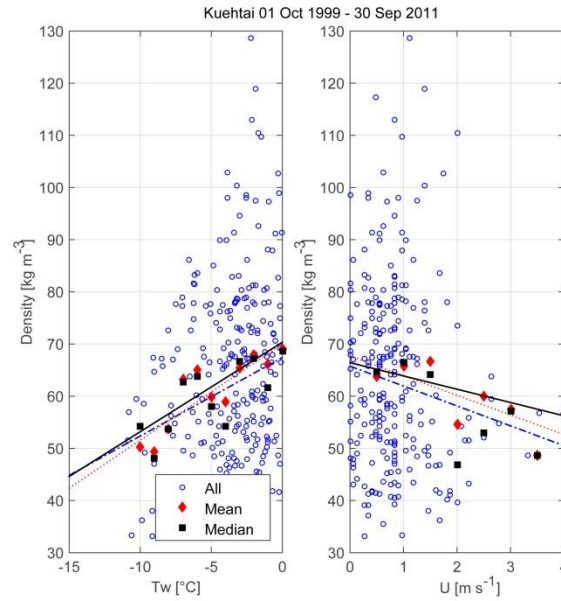

Figure S20: Linear regression between the corrected densities ( $\rho_{\text{corr}}$ ) as dependent variable and wet bulb ( $T_w$ , left) as well as wind speed ( $U$ , right) as explanatory variables for all filtered value pairs (nth, blues dots, dashed blue line) at Kühtai station for the period 3 (1 Oct 1999 - 30 Sep 2011), and for the class mean (red diamonds, dotted red line) and median (black squares, solid black line) of binned  $0.5^\circ \text{ K}$  classes and of binned  $0.5 \text{ ms}^{-1}$  classes, respectively. Numbers are given in Tab. 3 and 4.

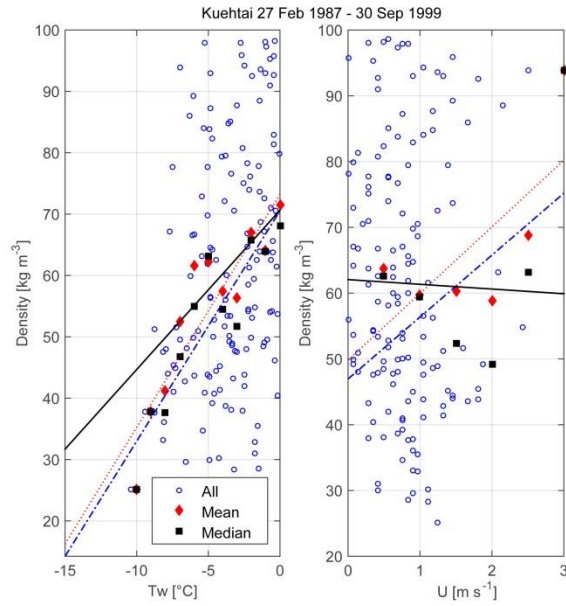

Figure S21: Linear regression between the corrected densities ( $\rho_{\text{corr}}$ ) as dependent variable and wet bulb temperature ( $T_w$ , left) as well as wind speed ( $U$ , right) as explanatory variables for all filtered value pairs (nth, blues dots, dashed blue line) at Kühtai station for the period 4 (27 Feb 1987 - 30 Sep 1999), and for the class mean (red diamonds, dotted red line) and median (black squares, solid black line) of binned  $0.5^\circ \text{ K}$  classes and of binned  $0.5 \text{ ms}^{-1}$  classes, respectively. Numbers are given in Tab. 3 and 4.

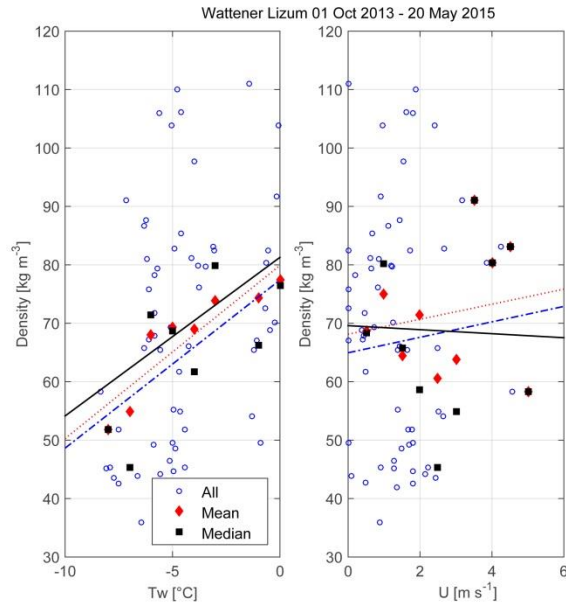

Figure S22: Linear regression between the corrected densities ( $\rho_{\text{corr}}$ ) as dependent variable and wet bulb temperature ( $T_w$ , left) as well as wind speed ( $U$ , right) as explanatory variables for all filtered value pairs (nth, blues dots, dashed blue line) at Wattener Lizum station for the period 1 (Oct 2013 - 20 May 2015), and for the class mean (red diamonds, dotted red line) and median (black squares, solid black line) of binned  $0.5^\circ \text{ K}$  classes and of binned  $0.5 \text{ ms}^{-1}$  classes, respectively. Numbers are given in Tab. 3 and 4.

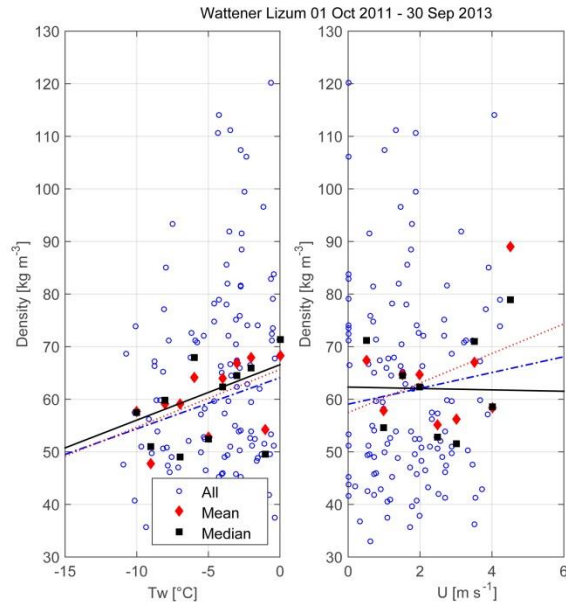

Figure S23: Linear regression between the corrected densities ( $\rho_{\text{corr}}$ ) as dependent variable and wet bulb temperature ( $T_w$ , left) as well as wind speed ( $U$ , right) as explanatory variables for all filtered value pairs (nth, blues dots, dashed blue line) at Wattener Lizum station for the period 2 (1 Oct 2011 - 30 Sep 2013), and for the class mean (red diamonds, dotted red line) and median (black squares, solid black line) of binned  $0.5^\circ \text{ K}$  classes and of binned  $0.5 \text{ ms}^{-1}$  classes, respectively. Numbers are given in Tab. 3 and 4.

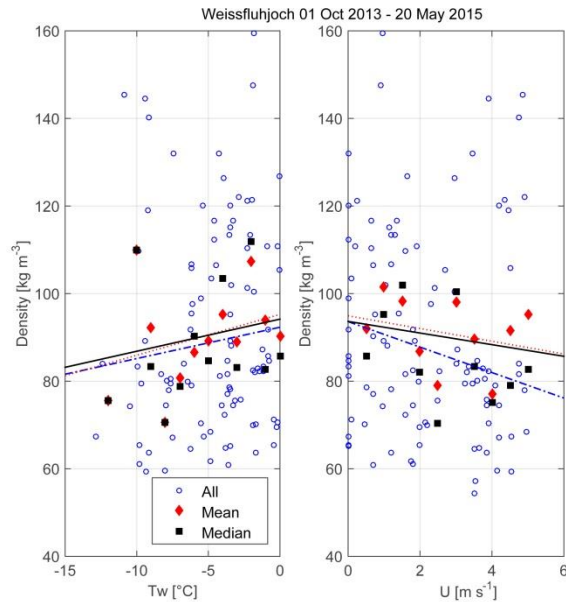

Figure S24: Linear regression between the corrected densities ( $\rho_{\text{corr}}$ ) as dependent variable and wet bulb temperature ( $T_w$ , left) as well as wind speed ( $U$ , right) as explanatory variables for all filtered value pairs (nth, blues dots, dashed blue line) at Weissfluhjoch station for the period 1 (01 Oct 2013 - 20 May 2015), and for the class mean (red diamonds, dotted red line) and median (black squares, solid black line) of binned  $0.5^\circ \text{ K}$  classes and of binned  $0.5 \text{ ms}^{-1}$  classes, respectively. Numbers are given in Tab. 3 and 4.

median (black squares, solid black line) of binned  $0.5^{\circ}$  K classes and of binned  $0.5 \text{ ms}^{-1}$  classes, respectively. Numbers are given in Tab. 3 and 4.
